# Supplementary material for: Acute Treatment Patterns, Migraine Burden, and Healthcare Resource Use in People With Migraine: Results From the OVERCOME (EU) Observational Study
Source: PubMed Central journal article supplement — Pain Ther. 2024 Apr 16;13(3):589–607. doi: 10.1007/s40122-024-00589-3 (PMC11111430; doi:10.1007/s40122-024-00589-3), 2024-04-16
Supplement: 40122_2024_589_MOESM1_ESM.pdf [file 40122_2024_589_MOESM1_ESM.pdf]

**Title:** Acute Treatment Patterns, Migraine Burden, and Healthcare Resource Use in People With Migraine: Results From the OVERCOME (EU) Observational Study

**Authors Details :** Stefan Evers<sup>1,2</sup>, Grazia Dell’Agnello<sup>3</sup>, Diego Novick<sup>4</sup>, H Saygin Gonderter<sup>5</sup>, Tommaso Panni<sup>6</sup>, Julio Pascual<sup>7</sup>

**Author Affiliation(s):**

<sup>1</sup>University of Münster, Münster, Germany.

<sup>2</sup>Lindenbrunn Hospital, Copenbrügge, Germany.

<sup>3</sup>Eli Lilly Italia SpA, Sesto Fiorentino, Italy.

<sup>4</sup>Eli Lilly and Company Ltd., Bracknell, UK.

<sup>5</sup>Eli Lilly and Company Ltd., Dubai, UAE.

<sup>6</sup>Eli Lilly Deutschland GmbH, Bad Homburg, Germany.

<sup>7</sup>Hospital Universitario Marqués de Valdecilla, Universidad de Cantabria and IDIVAL, Santander, Spain.

**Correspondence Details:** Grazia Dell’Agnello

**Address: Eli Lilly Italia SpA**

**Sesto Fiorentino, Italy**

**Supplementary Table 1. Current acute migraine/severe headache medication use in participants also using preventive medication (total migraine cohort)**

|                                                                                                                   | Total<br>(N=19,207) | HD/month          |                  |                   |                |
|-------------------------------------------------------------------------------------------------------------------|---------------------|-------------------|------------------|-------------------|----------------|
|                                                                                                                   |                     | 0–3<br>(N=12,569) | 4–7<br>(N=3,989) | 8–14<br>(N=1,659) | ≥15<br>(N=990) |
| <b>Number of participants using current preventive antidepressant medication combined with: n (%)<sup>a</sup></b> |                     |                   |                  |                   |                |
| <b>Any current acute medication</b>                                                                               | <b>2,960</b>        | <b>1,870</b>      | <b>619</b>       | <b>278</b>        | <b>193</b>     |
| Triptans <sup>b</sup>                                                                                             | 2,432<br>(82.2)     | 1,569 (83.9)      | 505 (81.6)       | 221 (79.5)        | 137 (71.0)     |
| Ergot alkaloids <sup>c</sup>                                                                                      | 211 (7.1)           | 134 (7.2)         | 45 (7.3)         | 23 (8.3)          | 9 (4.7)        |
| NSAIDs (on prescription)                                                                                          | 2,364<br>(79.9)     | 1,473 (78.8)      | 507 (81.9)       | 227 (81.7)        | 157 (81.3)     |
| Paracetamol (prescription or OTC)                                                                                 | 1,299<br>(43.9)     | 737 (39.4)        | 329 (53.2)       | 147 (52.9)        | 86 (44.6)      |
| OTC analgesics <sup>d</sup>                                                                                       | 2,115<br>(71.5)     | 1,356 (72.5)      | 460 (74.3)       | 191 (68.7)        | 108 (56.0)     |
| Other prescription drugs                                                                                          | 1,505<br>(50.8)     | 872 (46.6)        | 336 (54.3)       | 169 (60.8)        | 128 (66.3)     |
| Other OTC drugs                                                                                                   | 351 (11.9)          | 173 (9.3)         | 90 (14.5)        | 53 (19.1)         | 35 (18.1)      |
| Suppositories <sup>e</sup> (prescription or OTC)                                                                  | 2,366<br>(79.9)     | 1,643 (87.9)      | 446 (72.1)       | 181 (65.1)        | 96 (49.7)      |

---

**Number of participants using current preventive antiseizure medication combined with: n (%)<sup>a</sup>**

---

| <b>Any current acute medication</b>              | <b>2,754</b> | <b>1,757</b> | <b>594</b> | <b>233</b> | <b>170</b> |
|--------------------------------------------------|--------------|--------------|------------|------------|------------|
| Triptans <sup>b</sup>                            | 2,323 (84.4) | 1,477 (84.1) | 510 (85.9) | 199 (85.4) | 137 (80.6) |
| Ergot alkaloids <sup>c</sup>                     | 212 (7.7)    | 134 (7.6)    | 47 (7.9)   | 20 (8.6)   | 11 (6.5)   |
| NSAIDs (on prescription)                         | 2,194 (79.7) | 1,392 (79.2) | 478 (80.5) | 191 (82.0) | 13 (78.2)  |
| Paracetamol (prescription or OTC)                | 1,143 (41.5) | 663 (37.7)   | 248 (47.8) | 120 (51.5) | 76 (44.7)  |
| OTC analgesics <sup>d</sup>                      | 1,961 (71.2) | 1,284 (73.1) | 417 (70.2) | 163 (70.0) | 97 (57.1)  |
| Other prescription drugs                         | 1,411 (51.2) | 831 (47.3)   | 329 (55.4) | 141 (60.5) | 110 (64.7) |
| Other OTC drugs                                  | 301 (10.9)   | 158 (9.0)    | 71 (12.0)  | 41 (17.6)  | 31 (18.2)  |
| Suppositories <sup>e</sup> (prescription or OTC) | 2,280 (82.8) | 1,556 (88.6) | 460 (77.4) | 164 (70.4) | 100 (58.8) |

---

**Number of participants using current preventive antihypertensive medication combined with: n (%)<sup>a</sup>**

---

| <b>Any current acute medication</b> | <b>3,054</b> | <b>1,961</b> | <b>640</b> | <b>282</b> | <b>171</b> |
|-------------------------------------|--------------|--------------|------------|------------|------------|
| Triptans <sup>b</sup>               | 2,547 (83.4) | 1,625 (82.9) | 554 (86.6) | 236 (83.7) | 132 (77.2) |

---

|                                                  |              |              |            |            |            |
|--------------------------------------------------|--------------|--------------|------------|------------|------------|
| Ergot alkaloids <sup>c</sup>                     | 213 (7.0)    | 135 (6.9)    | 48 (7.5)   | 20 (7.1)   | 10 (5.8)   |
| NSAIDs (on prescription)                         | 2,421 (79.3) | 1,534 (78.2) | 518 (80.9) | 228 (80.9) | 141 (82.5) |
| Paracetamol (prescription or OTC)                | 1,345 (44.0) | 786 (40.1)   | 324 (50.6) | 152 (53.9) | 83 (48.5)  |
| OTC analgesics <sup>d</sup>                      | 2,204 (72.2) | 1,436 (73.2) | 469 (73.3) | 190 (67.4) | 109 (63.7) |
| Other prescription drugs                         | 1,489 (48.8) | 906 (46.2)   | 331 (51.7) | 148 (52.5) | 104 (60.8) |
| Other OTC drugs                                  | 345 (11.3)   | 178 (9.1)    | 89 (13.9)  | 45 (16.0)  | 33 (19.3)  |
| Suppositories <sup>e</sup> (prescription or OTC) | 2,453 (80.3) | 1,664 (84.9) | 500 (78.1) | 191 (67.7) | 98 (57.3)  |

**Number of participants using current preventive injectable migraine medication combined with: n (%)<sup>a</sup>**

|                                     |              |            |            |            |           |
|-------------------------------------|--------------|------------|------------|------------|-----------|
| <b>Any current acute medication</b> | <b>1,422</b> | <b>943</b> | <b>293</b> | <b>116</b> | <b>70</b> |
| Triptans <sup>b</sup>               | 1,263 (88.8) | 835 (88.5) | 264 (90.1) | 102 (87.9) | 62 (88.6) |
| Ergot alkaloids <sup>c</sup>        | 134 (9.4)    | 89 (9.4)   | 27 (9.2)   | 10 (8.6)   | 8 (11.4)  |
| NSAIDs (on prescription)            | 1,122 (78.9) | 737 (78.2) | 236 (80.5) | 96 (82.8)  | 53 (75.7) |
| Paracetamol (prescription or OTC)   | 543 (38.2)   | 324 (34.4) | 134 (45.7) | 52 (44.8)  | 33 (47.1) |

|                                                  |              |            |            |           |           |
|--------------------------------------------------|--------------|------------|------------|-----------|-----------|
| OTC analgesics <sup>d</sup>                      | 1,025 (72.1) | 687 (72.9) | 214 (73.0) | 81 (69.8) | 43 (61.4) |
| Other prescription drugs                         | 678 (47.7)   | 420 (44.5) | 156 (53.2) | 62 (53.4) | 40 (57.1) |
| Other OTC drugs                                  | 157 (11.0)   | 84 (8.9)   | 42 (14.3)  | 17 (14.7) | 14 (20.0) |
| Suppositories <sup>e</sup> (prescription or OTC) | 1,300 (91.4) | 895 (94.9) | 261 (89.1) | 98 (84.5) | 46 (65.7) |

<sup>a</sup>Percentages are based on the number of participants taking each class of preventive medications combined with any current acute medication; <sup>b</sup>Triptans are available on prescription or OTC in Germany but are prescription only in Spain; <sup>c</sup>Ergot alkaloids are only reimbursed in Germany; <sup>d</sup>e.g., aspirin, loxoprophen; <sup>e</sup>Any suppository used to treat or relieve migraine or severe headache (data were not analyzed according to the type of suppository used). Sumatriptan is available as a suppository in Germany but not in Spain.

HD, headache days; NSAID, non-steroidal anti-inflammatory drug; OTC, over-the-counter; SD, standard deviation
